# Supplementary material
Source: publisher site journal article supplement (https://www.dovepress.com/article/409365)
Supplement: Supplementary file 1 [file get_supplementary_file.php]

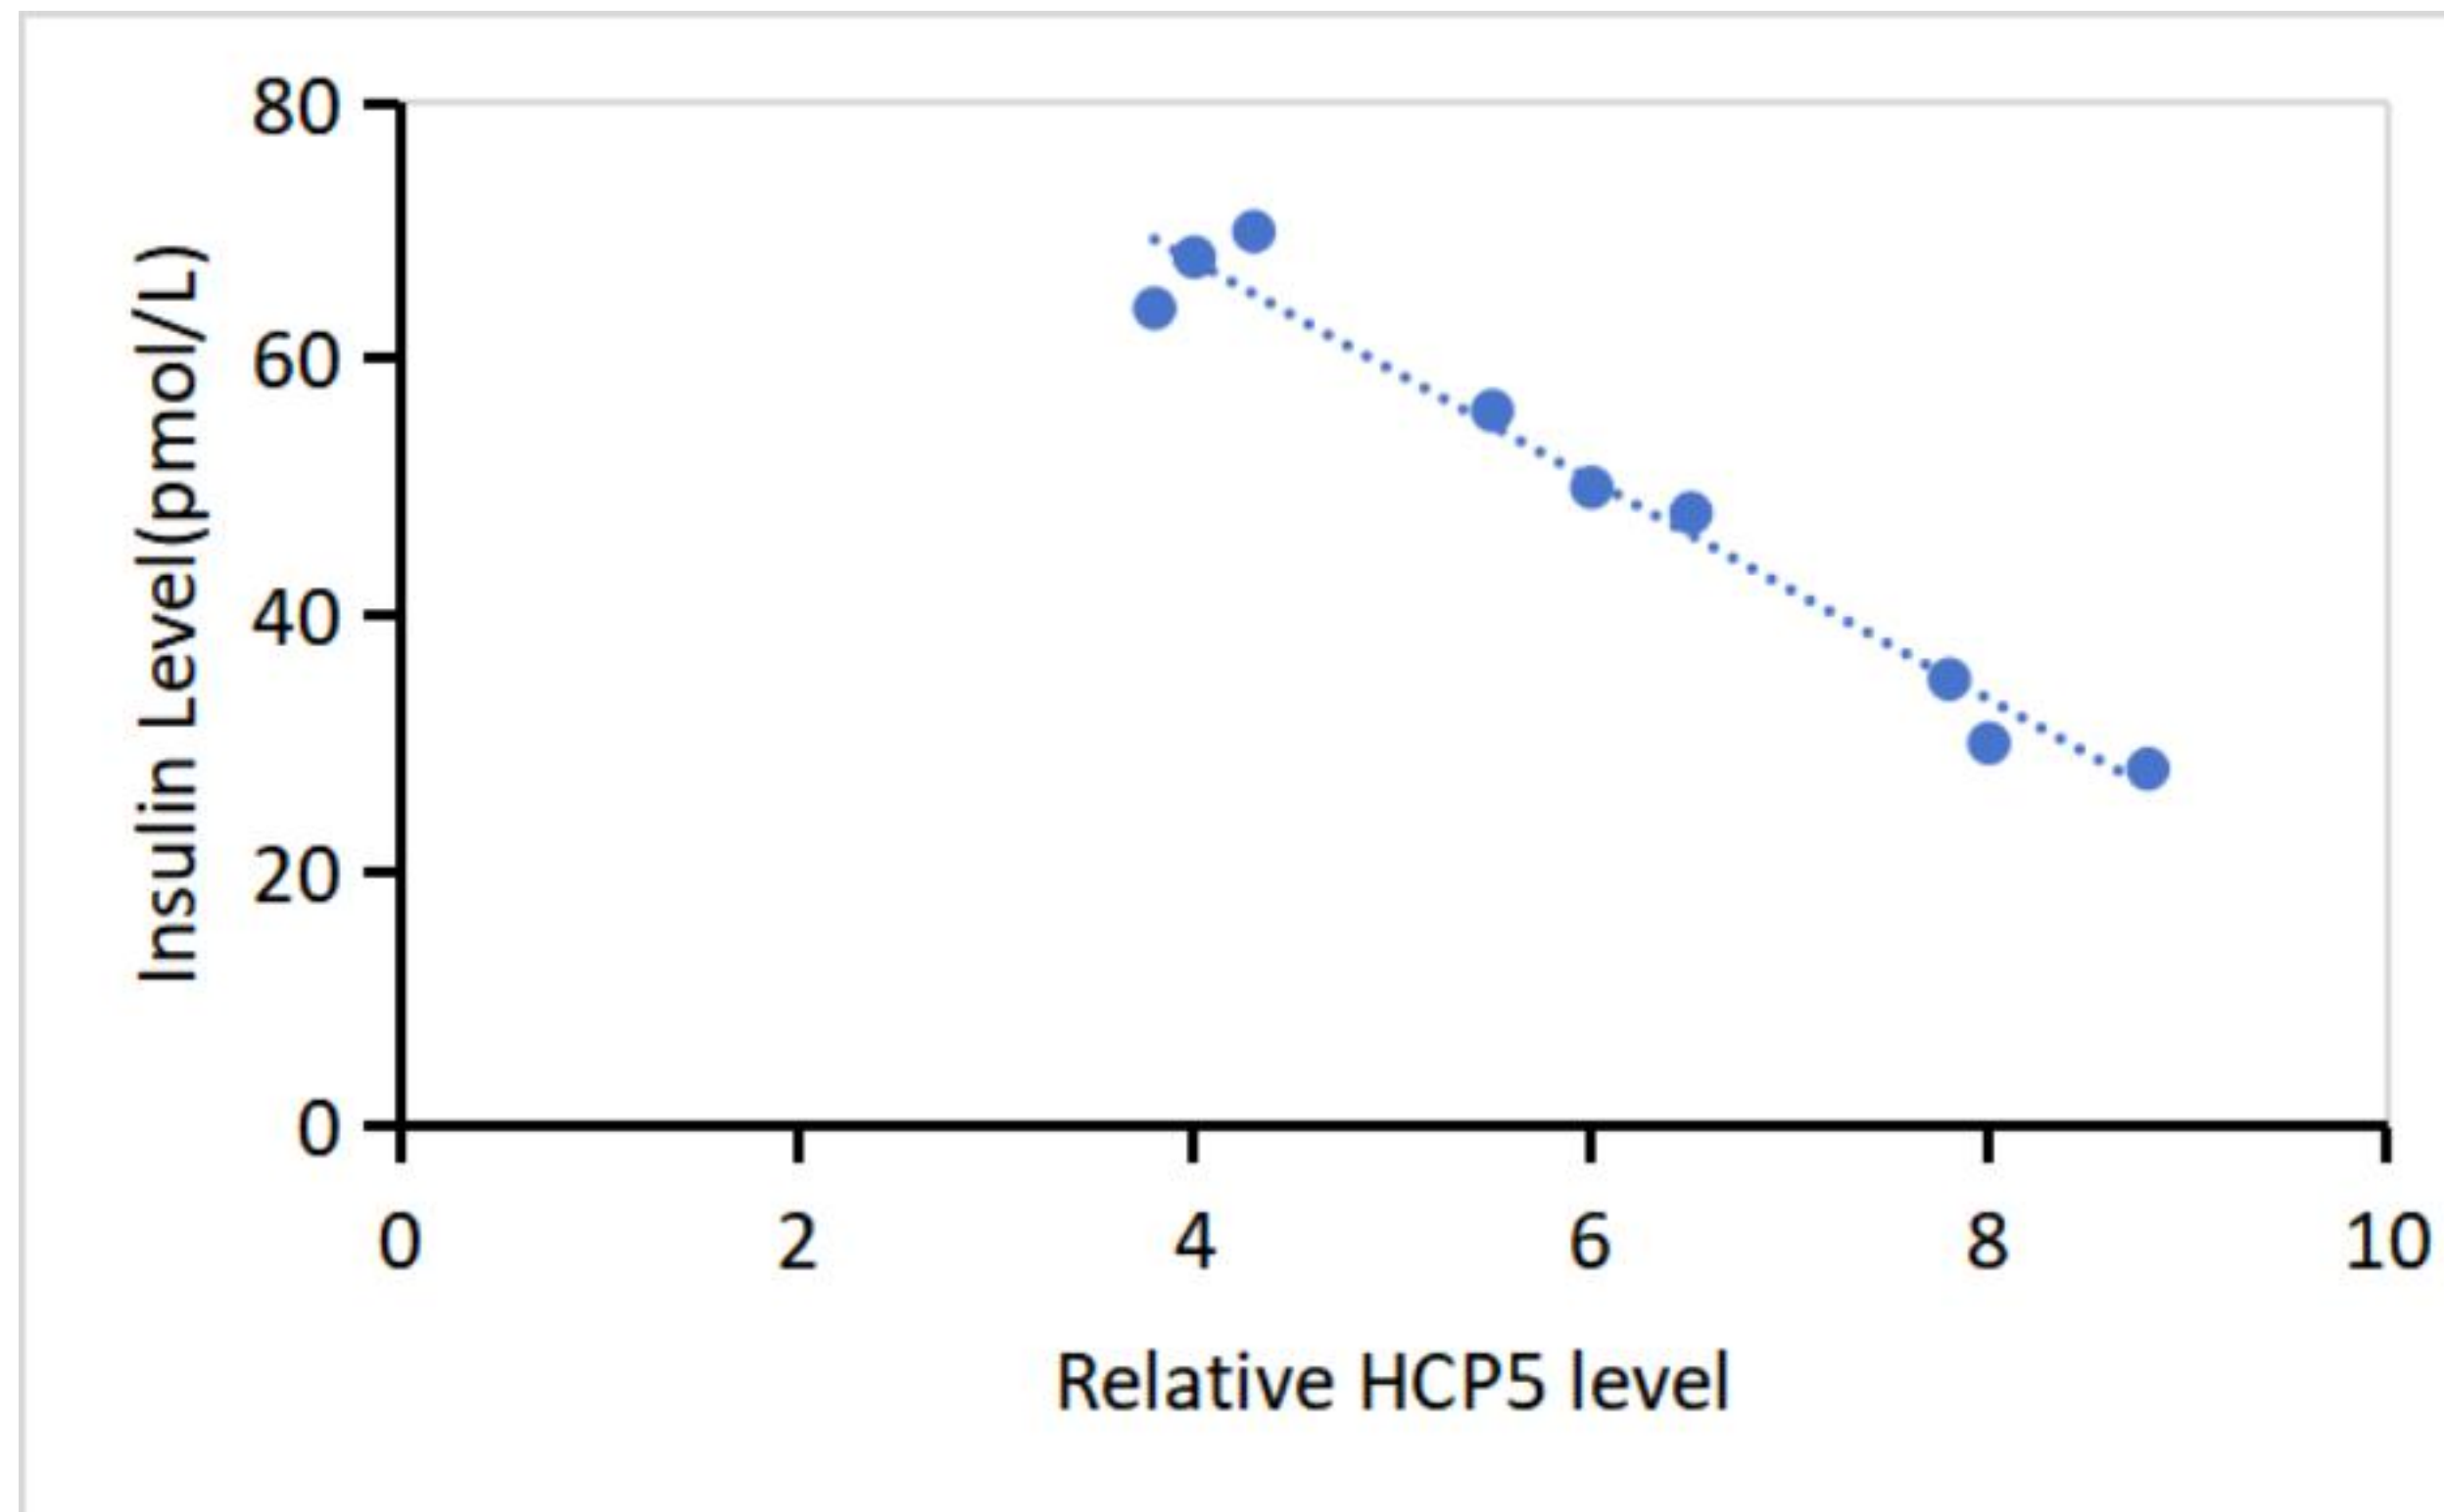

Supplementary Figure 1. The relationship between HCP5 and insulin secretion. Insulin levels were analyzed followed by different levels of HCP expression.
